# Supplementary material
Source: Springer Nature journal article supplement (https://www.springermedizin.de/resource/supplementary/12914_2011_204_MOESM2_ESM.pdf/9537052)

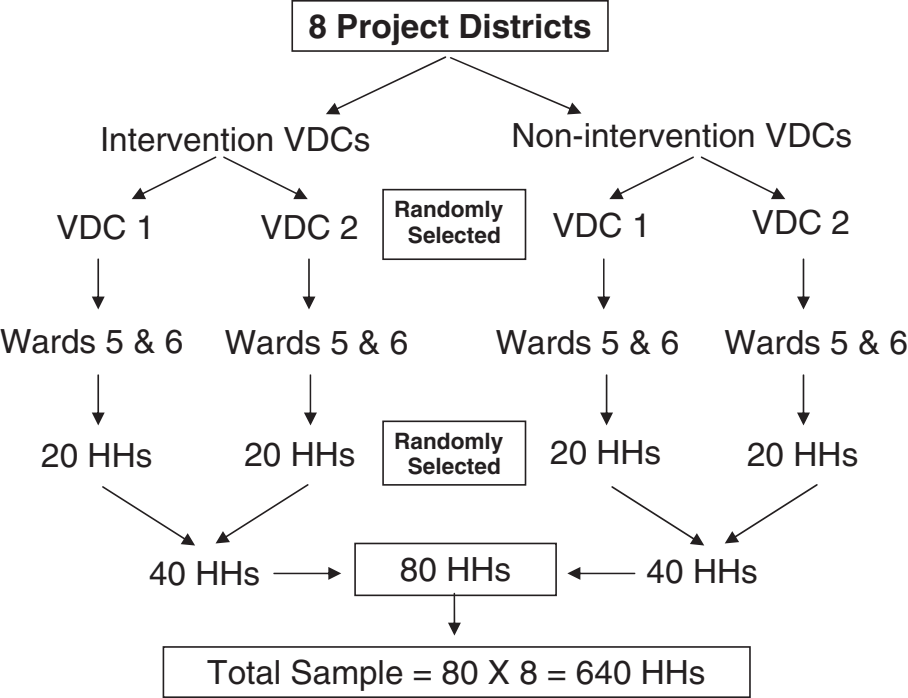

Supplement: MOESM2 [file 9537052]
